# Supplementary material
Source: PubMed Central journal article supplement (PMC5753866)
Supplement: 323FileS2.pdf [file 323FileS2.pdf]

**File S2. Extended Moran model simulations**

In this Supporting Information we compare a set of tree statistics obtained from the ancestral process  $(\mathcal{A}_{[t/c_N(0)]k}^{\psi,\rho})_{t \in \mathbb{R}_{\geq 0}}$  from the underlying extended Moran model to those obtained from the coalescent process  $(\Pi_{t,k}^{\psi,\rho})_{t \geq 0}$  for different values of  $\rho \in \mathbb{R}_{\geq 0}$ ,  $\psi \in (0, 1)$  with  $\gamma = 1.5$  (i.e., in the regime where sweepstake reproductive events dominate and the corresponding ancestral process is a time-inhomogeneous psi-coalescent). Coalescent simulations follow the algorithm outlined in the main text.

The rationale behind the extended Moran model simulations is outlined in Figure A.

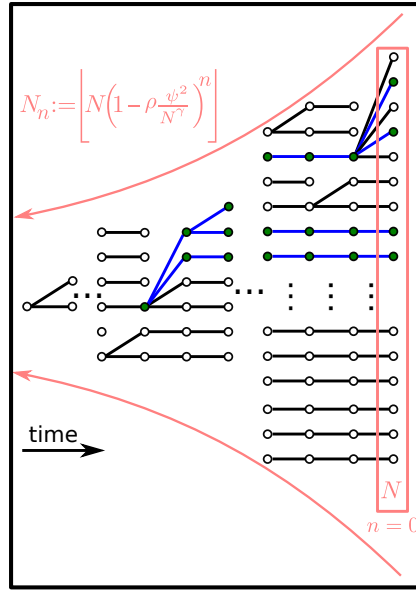

**Figure A** – Illustration of genealogical relation in the extended Moran model with exponential growth. Circles denote individuals; time increases from left to right with the rightmost individuals constituting the present population. Green circles denote sampled individuals. Connecting lines between circles show the genealogical relationship between individuals; the genealogy of the sampled individuals is highlighted with blue. Pink lines illustrate that population size increases (forward in time) exponentially with rate  $\rho$ .

Starting from the present (i.e.,  $n = 0$ ) and choosing  $k$  random samples, these were followed successively backwards in time thus creating a coalescent tree from the leaves to the root. At each time step the population size was adjusted (shrinking backward in time; eq. 6) and the type of the reproductive event (eq. 5) along with the corresponding number of offspring  $U_N(n)$  (eq. 4) were (randomly) determined. Finally, to determine whether a merger event has occurred – i.e., if one of the  $k$  active lineages had found its parent in the previous time step – we drew a Hypergeometric random number  $Y$  with parameters  $k$ ,  $N_n - k$  and  $U_N(n)$ . When  $y > 1$ , i.e., when at least a 2-merger event has occurred, the number of active lineages  $k$  in the next time step becomes  $k + 1 - y$ , and remains constant otherwise. This process is repeated until  $k = 1$ , that is until all samples have found their most recent common ancestor.

For both processes the total tree length  $T_{\text{tot}}$ , the time to the most recent common ancestor  $TM\text{RCA}$ , and the ratio of the sum of the length of all branches with  $i$  descendants over the total tree length  $T_i / T_{\text{tot}}$  were recorded. While the number of samples was limited to  $k = 4$  for computational reasons, the match between coalescent and Moran model simulations was almost perfect across the entire range of  $\psi$  (Fig. B-D). Only for very small  $\psi$  we observed some slight deviations observed.

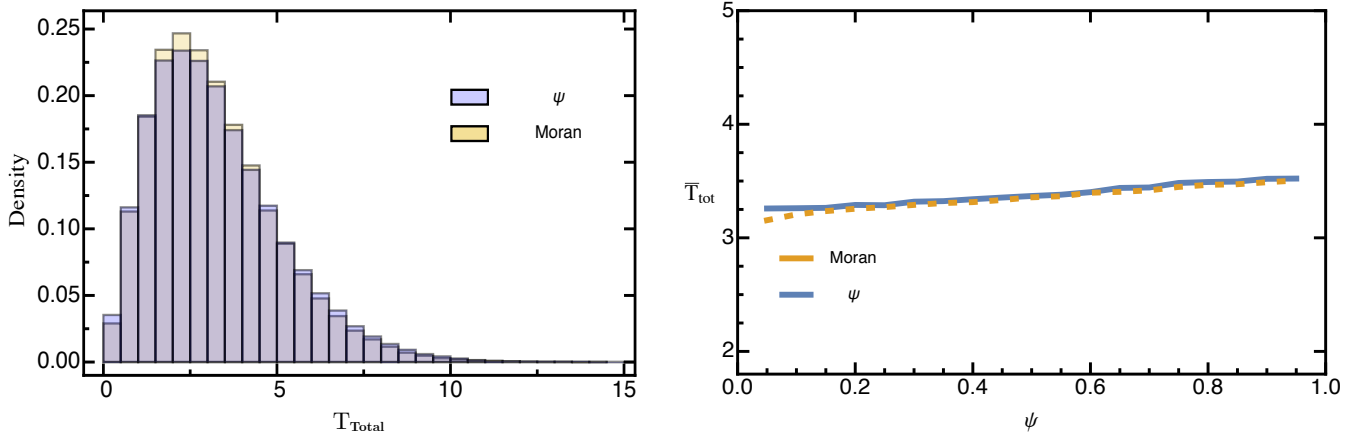

**Figure B** – The left figure shows a comparison of  $\bar{T}_{\text{tot}}$  based on simulated trajectories of  $(\mathcal{A}_{[t/c_N(0)]k}^{\psi,\rho})_{t \geq 0}$  and  $(\Pi_{t,k}^{\psi,\rho})_{t \geq 0}$  for  $\rho = 0.1$ ,  $\gamma = 1.5$ , and different values of  $\psi$ . The right figure depicts the corresponding empirical distributions of  $T_{\text{tot}}^{(i)}$  for  $\psi = 0.1$ . Averages were taken over 100,000 replicates. Other parameters:  $N = 100,000$ .

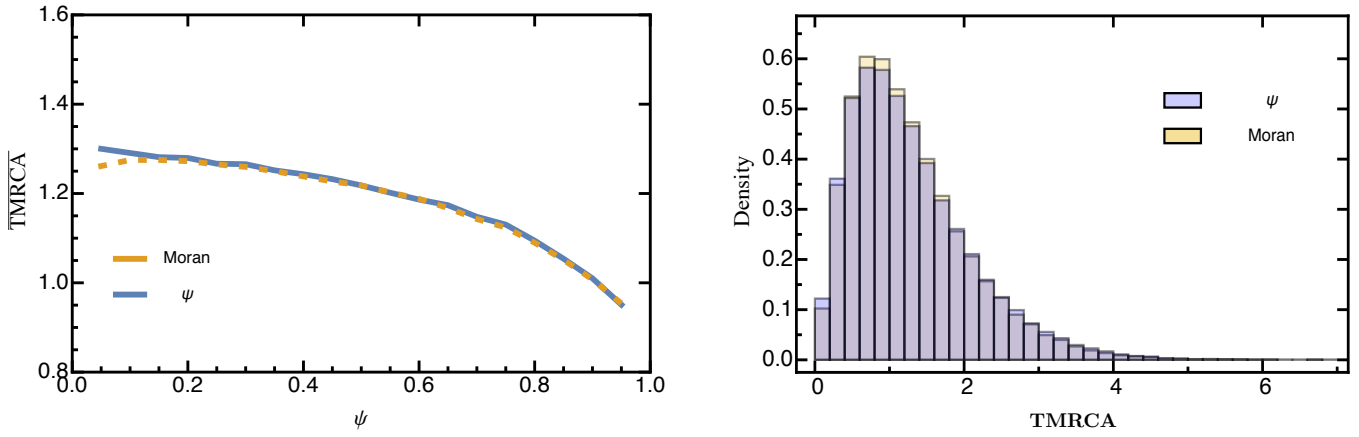

**Figure C** – The left figure shows a comparison of  $\bar{T}_{MRC A}$  based on simulated trajectories of  $(\mathcal{A}_{[t/c_N(0)]A}^{\psi,\rho})_{t \geq 0}$  and  $(\Pi_{t,A}^{\psi,\rho})_{t \geq 0}$  for  $\rho = 0.1, \gamma = 1.5$ , and different values of  $\psi$ . The right figure depicts the corresponding empirical distributions of  $T_{MRC A}^{(i)}$  for  $\psi = 0.1$ . Averages were taken over 100,000 replicates. Other parameters:  $N = 100,000$ .

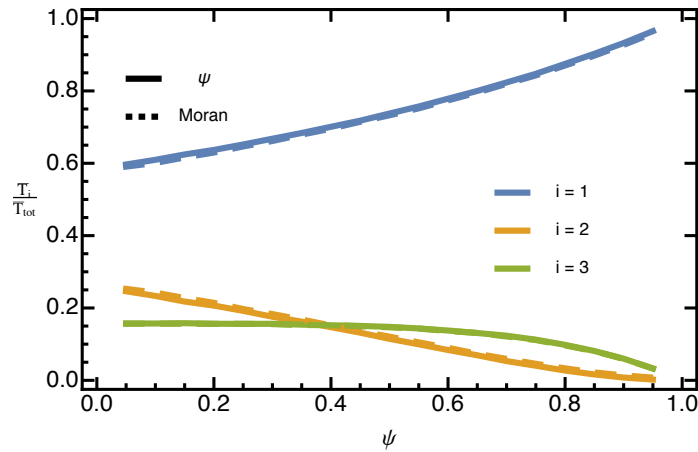

**Figure D** – A comparison of  $(T_i / \bar{T}_{tot})_{i=1,2,3}$  based on simulated trajectories of  $(\mathcal{A}_{[t/c_N(0)]A}^{\psi,\rho})_{t \geq 0}$  and  $(\Pi_{t,A}^{\psi,\rho})_{t \geq 0}$  for  $\rho = 0.1, \gamma = 1.5$ , and different values of  $\psi$ . Averages were taken over 100,000 replicates. Other parameters:  $N = 100,000$ .

These results highlight two important points. First and reassuringly these results indicate that for large initial population sizes  $N$  the extended Moran model can be described by its limiting ancestral process (i.e., the psi-coalescent). Second, simulating the population dynamics forward in time is computationally intensive and prohibitively slow. However, since the ancestral process accurately captures the forward-in-time population dynamics, the coalescent process can be used to simulate the process quickly and efficiently over a large parameter space and for large sample sizes.
