# Supplementary material
Source: PubMed Central journal article supplement (PMC5753866)
Supplement: 323FileS4.pdf [file 323FileS4.pdf]

**File S4. Supporting Tables**

**Table S1** – Overview of the (marginal) accuracy  $\hat{\psi}$  when assuming independent sites. Each cell shows the mean difference (first row), the mean squared error (second row) and the median difference (third row) of  $\hat{\psi}$  calculated over 10,000 data sets assuming independent sites. Colors within each sub-table range from light yellow to dark red and scale between the minimal and the maximal absolute value to aid interpretation.

|           | $s = 100$             |                        |                        |                        |                        | $s = 1,000$            |                        |                         |  |  | $s = 10,000$          |  |  |  |  |  |  |  |  |  |
|-----------|-----------------------|------------------------|------------------------|------------------------|------------------------|------------------------|------------------------|-------------------------|--|--|-----------------------|--|--|--|--|--|--|--|--|--|
| $k = 20$  | Mean deviation $\psi$ |                        |                        |                        |                        | Mean deviation $\psi$  |                        |                         |  |  | Mean deviation $\psi$ |  |  |  |  |  |  |  |  |  |
|           | 100                   | $1.651 \times 10^{-2}$ | $6.872 \times 10^{-2}$ | $1.994 \times 10^{-1}$ | $2.946 \times 10^{-1}$ | $2.226 \times 10^{-1}$ | $2.913 \times 10^{-1}$ | $5.245 \times 10^{-1}$  |  |  |                       |  |  |  |  |  |  |  |  |  |
|           | 10                    | $1.471 \times 10^{-1}$ | $1.042 \times 10^{-1}$ | $3.195 \times 10^{-1}$ | $2.358 \times 10^{-1}$ | $1.528 \times 10^{-1}$ | $8.201 \times 10^{-2}$ | $2.756 \times 10^{-1}$  |  |  |                       |  |  |  |  |  |  |  |  |  |
| $k = 50$  | Mean deviation $\psi$ |                        |                        |                        |                        | Mean deviation $\psi$  |                        |                         |  |  | Mean deviation $\psi$ |  |  |  |  |  |  |  |  |  |
|           | 100                   | $6.065 \times 10^{-3}$ | $1.833 \times 10^{-2}$ | $4.483 \times 10^{-2}$ | $1.089 \times 10^{-1}$ | $1.869 \times 10^{-1}$ | $1.38 \times 10^{-1}$  | $-1.38 \times 10^{-1}$  |  |  |                       |  |  |  |  |  |  |  |  |  |
|           | 10                    | $5.694 \times 10^{-3}$ | $2.055 \times 10^{-2}$ | $6.731 \times 10^{-2}$ | $1.645 \times 10^{-1}$ | $1.408 \times 10^{-1}$ | $1.55 \times 10^{-1}$  | $4.33 \times 10^{-1}$   |  |  |                       |  |  |  |  |  |  |  |  |  |
| $k = 100$ | Mean deviation $\psi$ |                        |                        |                        |                        | Mean deviation $\psi$  |                        |                         |  |  | Mean deviation $\psi$ |  |  |  |  |  |  |  |  |  |
|           | 100                   | $1.377 \times 10^{-4}$ | $6.289 \times 10^{-4}$ | $2.832 \times 10^{-3}$ | $3.471 \times 10^{-2}$ | $3.504 \times 10^{-2}$ | $2.608 \times 10^{-2}$ | $1.113 \times 10^{-1}$  |  |  |                       |  |  |  |  |  |  |  |  |  |
|           | 10                    | $1.172 \times 10^{-3}$ | $2.601 \times 10^{-3}$ | $1.498 \times 10^{-2}$ | $1.497 \times 10^{-1}$ | $2.74 \times 10^{-1}$  | $2.375 \times 10^{-1}$ | $9.374 \times 10^{-1}$  |  |  |                       |  |  |  |  |  |  |  |  |  |
| $k = 200$ | Mean deviation $\psi$ |                        |                        |                        |                        | Mean deviation $\psi$  |                        |                         |  |  | Mean deviation $\psi$ |  |  |  |  |  |  |  |  |  |
|           | 100                   | $1.081 \times 10^{-1}$ | $4.287 \times 10^{-1}$ | $7.295 \times 10^{-1}$ | $4.881 \times 10^{-1}$ | $3.005 \times 10^{-1}$ | $1.086 \times 10^{-1}$ | $-8.809 \times 10^{-1}$ |  |  |                       |  |  |  |  |  |  |  |  |  |
|           | 10                    | $2.653 \times 10^{-1}$ | $1.134 \times 10^{-1}$ | $4.511 \times 10^{-1}$ | $3.609 \times 10^{-1}$ | $2.32 \times 10^{-1}$  | $9.201 \times 10^{-1}$ | $-2.217 \times 10^{-1}$ |  |  |                       |  |  |  |  |  |  |  |  |  |

**Table S2** – Overview of the (marginal) accuracy  $\hat{\rho}$  when assuming independent sites. Each cell shows the mean difference (first row), the mean squared error (second row) and the median difference (third row) of  $\hat{\rho}$  (right column) calculated over 10,000 data sets assuming independent sites. Colors within each sub-table range from light yellow to dark red and scale between the minimal and the maximal absolute value to aid interpretation.

|           | $s = 100$                   |  |  |  |  |  | $s = 1,000$ |  |  |  |  |  | $s = 10,000$ |  |  |  |  |  |
|-----------|-----------------------------|--|--|--|--|--|-------------|--|--|--|--|--|--------------|--|--|--|--|--|
| $k = 20$  | Mean deviation $\hat{\rho}$ |  |  |  |  |  |             |  |  |  |  |  |              |  |  |  |  |  |
|           | 100                         |  |  |  |  |  | 100         |  |  |  |  |  | 100          |  |  |  |  |  |
|           | 0                           |  |  |  |  |  | 0           |  |  |  |  |  | 0            |  |  |  |  |  |
| $k = 50$  | Mean deviation $\hat{\rho}$ |  |  |  |  |  |             |  |  |  |  |  |              |  |  |  |  |  |
|           | 100                         |  |  |  |  |  | 100         |  |  |  |  |  | 100          |  |  |  |  |  |
|           | 0                           |  |  |  |  |  | 0           |  |  |  |  |  | 0            |  |  |  |  |  |
| $k = 100$ | Mean deviation $\hat{\rho}$ |  |  |  |  |  |             |  |  |  |  |  |              |  |  |  |  |  |
|           | 100                         |  |  |  |  |  | 100         |  |  |  |  |  | 100          |  |  |  |  |  |
|           | 0                           |  |  |  |  |  | 0           |  |  |  |  |  | 0            |  |  |  |  |  |
| $k = 200$ | Mean deviation $\hat{\rho}$ |  |  |  |  |  |             |  |  |  |  |  |              |  |  |  |  |  |
|           | 100                         |  |  |  |  |  | 100         |  |  |  |  |  | 100          |  |  |  |  |  |
|           | 0                           |  |  |  |  |  | 0           |  |  |  |  |  | 0            |  |  |  |  |  |

*(Note: The above table structure represents the layout of the data in the image, with numerical values and color coding for each cell. The full table contains 180 sub-tables, each corresponding to a combination of k and s values.)*

**Table S3** – Comparison of the (marginal) accuracy of  $\hat{\psi}$  (left column) and  $\hat{\rho}$  (right column) for  $k = 100$  (i.e., the reference) and  $k = 200$  when assuming independent sites. Each cell shows the difference of the absolute mean difference ( $|MD_{k=100}| - |MD_{k=200}|$ ; first row), the difference of the mean absolute difference ( $MAD_{k=100} - MAD_{k=200}$ ; third row) and the difference of the mean squared error ( $MSE_{k=100} - MSE_{k=200}$ ; third row) each calculated over 10,000 data sets assuming independent sites and  $\theta$  (eq. 45) with  $s = 10,000$ . Colors within each sub-table range from light yellow to dark red and scale between the minimal and the maximal absolute value to aid interpretation.

| Mean deviation $\psi$          |    |                          |                          |                           |                          | Mean deviation $\rho$          |                           |                          |                          |                          |                          |                          |                          |
|--------------------------------|----|--------------------------|--------------------------|---------------------------|--------------------------|--------------------------------|---------------------------|--------------------------|--------------------------|--------------------------|--------------------------|--------------------------|--------------------------|
| 100                            | 0. | -3.1 × 10 <sup>-6</sup>  | -5.2 × 10 <sup>-5</sup>  | 8.3 × 10 <sup>-5</sup>    | 1.1 × 10 <sup>-5</sup>   | 100                            | -1.2 × 10 <sup>-3</sup>   | 2.44                     | 4.12                     | 1.109 × 10 <sup>1</sup>  | 2.208 × 10 <sup>1</sup>  | 3.881 × 10 <sup>1</sup>  | 4.789 × 10 <sup>1</sup>  |
| 10                             | 0. | -1.57 × 10 <sup>-4</sup> | -2.39 × 10 <sup>-4</sup> | 7.7 × 10 <sup>-5</sup>    | 1.28 × 10 <sup>-4</sup>  | 10                             | 3 × 10 <sup>-4</sup>      | 9.78 × 10 <sup>-2</sup>  | 1.485 × 10 <sup>-1</sup> | 1.983 × 10 <sup>-1</sup> | 3.33 × 10 <sup>-1</sup>  | 8.583 × 10 <sup>-1</sup> | 1.866                    |
| 1                              | 0. | -1.32 × 10 <sup>-4</sup> | -2.83 × 10 <sup>-4</sup> | 3.9 × 10 <sup>-5</sup>    | -7 × 10 <sup>-5</sup>    | 1                              | 0.                        | 8.7 × 10 <sup>-3</sup>   | 9.1 × 10 <sup>-3</sup>   | 1.99 × 10 <sup>-2</sup>  | 4.13 × 10 <sup>-2</sup>  | 6.61 × 10 <sup>-2</sup>  | 7.35 × 10 <sup>-2</sup>  |
| 0                              | 0. | 3.37 × 10 <sup>-5</sup>  | -7.1 × 10 <sup>-5</sup>  | -2.47 × 10 <sup>-4</sup>  | -1 × 10 <sup>-5</sup>    | 0                              | 0.                        | 0.                       | 0.                       | 0.                       | 0.                       | 3 × 10 <sup>-4</sup>     | 8 × 10 <sup>-3</sup>     |
| $\rho/\psi$                    | 0  | 0.15                     | 0.3                      | 0.45                      | 0.6                      | 0.75                           | 0.9                       |                          |                          |                          |                          |                          |                          |
| Mean absolute deviation $\psi$ |    |                          |                          |                           |                          | Mean absolute deviation $\rho$ |                           |                          |                          |                          |                          |                          |                          |
| 100                            | 0. | 7.31 × 10 <sup>-4</sup>  | -6.68 × 10 <sup>-4</sup> | -8.41 × 10 <sup>-4</sup>  | -3.57 × 10 <sup>-4</sup> | 100                            | -3.595 × 10 <sup>-1</sup> | 4.916                    | 7.299                    | 1.567 × 10 <sup>1</sup>  | 2.781 × 10 <sup>1</sup>  | 4.425 × 10 <sup>1</sup>  | 5.699 × 10 <sup>1</sup>  |
| 10                             | 0. | 7.59 × 10 <sup>-4</sup>  | -5.51 × 10 <sup>-4</sup> | -8.55 × 10 <sup>-4</sup>  | -5.46 × 10 <sup>-4</sup> | 10                             | -6.3 × 10 <sup>-1</sup>   | 2.796 × 10 <sup>-1</sup> | 2.567 × 10 <sup>-1</sup> | 4.943 × 10 <sup>-1</sup> | 7.464 × 10 <sup>-1</sup> | 1.252                    | 2.421                    |
| 1                              | 0. | 5.48 × 10 <sup>-4</sup>  | 5.63 × 10 <sup>-4</sup>  | -5.61 × 10 <sup>-4</sup>  | -4.87 × 10 <sup>-4</sup> | 1                              | 0.                        | 8.7 × 10 <sup>-3</sup>   | 9.1 × 10 <sup>-3</sup>   | 1.99 × 10 <sup>-2</sup>  | 4.13 × 10 <sup>-2</sup>  | 6.63 × 10 <sup>-2</sup>  | 8.77 × 10 <sup>-2</sup>  |
| 0                              | 0. | 3.37 × 10 <sup>-4</sup>  | 5.71 × 10 <sup>-4</sup>  | -3.31 × 10 <sup>-4</sup>  | -4.86 × 10 <sup>-4</sup> | 0                              | 0.                        | 0.                       | 0.                       | 0.                       | 0.                       | 3 × 10 <sup>-4</sup>     | 8 × 10 <sup>-3</sup>     |
| $\rho/\psi$                    | 0  | 0.15                     | 0.3                      | 0.45                      | 0.6                      | 0.75                           | 0.9                       |                          |                          |                          |                          |                          |                          |
| Mean squared error $\psi$      |    |                          |                          |                           |                          | Mean squared error $\rho$      |                           |                          |                          |                          |                          |                          |                          |
| 100                            | 0. | 1.191 × 10 <sup>-3</sup> | -9.92 × 10 <sup>-3</sup> | -1.653 × 10 <sup>-2</sup> | -7.35 × 10 <sup>-3</sup> | 100                            | -3.933                    | 4.399 × 10 <sup>2</sup>  | 1.211 × 10 <sup>3</sup>  | 4.327 × 10 <sup>3</sup>  | 1.277 × 10 <sup>4</sup>  | 2.974 × 10 <sup>4</sup>  | 4.507 × 10 <sup>4</sup>  |
| 10                             | 0. | 9.53 × 10 <sup>-4</sup>  | -9.29 × 10 <sup>-4</sup> | -1.355 × 10 <sup>-3</sup> | -7.34 × 10 <sup>-4</sup> | 10                             | -8.1 × 10 <sup>-3</sup>   | 1.158                    | 3.582                    | 9.222                    | 2.806 × 10 <sup>1</sup>  | 2.07 × 10 <sup>2</sup>   | 2.07 × 10 <sup>2</sup>   |
| 1                              | 0. | 6.76 × 10 <sup>-4</sup>  | 8.83 × 10 <sup>-4</sup>  | -7.57 × 10 <sup>-4</sup>  | -5.31 × 10 <sup>-4</sup> | 1                              | 0.                        | 8.7 × 10 <sup>-3</sup>   | 9.1 × 10 <sup>-3</sup>   | 1.99 × 10 <sup>-2</sup>  | 4.13 × 10 <sup>-2</sup>  | 7.61 × 10 <sup>-2</sup>  | 2.003 × 10 <sup>-1</sup> |
| 0                              | 0. | 3.37 × 10 <sup>-4</sup>  | 7.11 × 10 <sup>-4</sup>  | -3.71 × 10 <sup>-4</sup>  | -5.06 × 10 <sup>-4</sup> | 0                              | 0.                        | 0.                       | 0.                       | 0.                       | 0.                       | 3 × 10 <sup>-4</sup>     | 8 × 10 <sup>-3</sup>     |
| $\rho/\psi$                    | 0  | 0.15                     | 0.3                      | 0.45                      | 0.6                      | 0.75                           | 0.9                       |                          |                          |                          |                          |                          |                          |

**Table S4** – Comparison of the (marginal) accuracy of  $\hat{\psi}$  (left column) and  $\hat{\rho}$  (right column) for  $k = 100$  (i.e., the reference) and  $k = 50$  when assuming independent sites. Each cell shows the difference of the absolute mean difference ( $|MD_{k=100}| - |MD_{k=50}|$ ; first row), the difference of the mean absolute difference ( $MAD_{k=100} - MAD_{k=50}$ ; third row) and the difference of the mean squared error ( $MSE_{k=100} - MSE_{k=50}$ ; third row) each calculated over 10,000 data sets assuming independent sites and  $\theta$  (eq. 45) with  $s = 10,000$ . Colors within each sub-table range from light yellow to dark red and scale between the minimal and the maximal absolute value to aid interpretation.

| Mean deviation $\psi$          |    |                         |                         |                          |                           | Mean deviation $\rho$          |                           |                          |                          |                          |                          |                          |                          |
|--------------------------------|----|-------------------------|-------------------------|--------------------------|---------------------------|--------------------------------|---------------------------|--------------------------|--------------------------|--------------------------|--------------------------|--------------------------|--------------------------|
| 100                            | 0. | -4 × 10 <sup>-6</sup>   | -2.4 × 10 <sup>-5</sup> | -4.85 × 10 <sup>-5</sup> | -2.3 × 10 <sup>-5</sup>   | 100                            | -1.075 × 10 <sup>-1</sup> | 1.451                    | 3.588                    | 4.329                    | 8.194                    | 1.389 × 10 <sup>1</sup>  | 2.93 × 10 <sup>1</sup>   |
| 10                             | 0. | -5 × 10 <sup>-6</sup>   | 3.9 × 10 <sup>-5</sup>  | 5 × 10 <sup>-5</sup>     | 1.03 × 10 <sup>-4</sup>   | 10                             | -4.9 × 10 <sup>-2</sup>   | 2.36 × 10 <sup>-2</sup>  | 6.37 × 10 <sup>-2</sup>  | 1.118 × 10 <sup>-1</sup> | 2.437 × 10 <sup>-1</sup> | 3.124 × 10 <sup>-1</sup> | 7.841 × 10 <sup>-1</sup> |
| 1                              | 0. | 3 × 10 <sup>-6</sup>    | -6.1 × 10 <sup>-6</sup> | -1.61 × 10 <sup>-5</sup> | -1.7 × 10 <sup>-5</sup>   | 1                              | 0.                        | 2.3 × 10 <sup>-3</sup>   | 9.1 × 10 <sup>-3</sup>   | 2.21 × 10 <sup>-2</sup>  | 3.55 × 10 <sup>-2</sup>  | 6.63 × 10 <sup>-2</sup>  | 1.1 × 10 <sup>-1</sup>   |
| 0                              | 0. | -2 × 10 <sup>-6</sup>   | 4.5 × 10 <sup>-6</sup>  | -6.2 × 10 <sup>-6</sup>  | 2.9 × 10 <sup>-5</sup>    | 0                              | 0.                        | 0.                       | 0.                       | 0.                       | 0.                       | 0.                       | 1.1 × 10 <sup>-1</sup>   |
| $\rho/\psi$                    | 0  | 0.15                    | 0.3                     | 0.45                     | 0.6                       | 0.75                           | 0.9                       |                          |                          |                          |                          |                          |                          |
| Mean absolute deviation $\psi$ |    |                         |                         |                          |                           | Mean absolute deviation $\rho$ |                           |                          |                          |                          |                          |                          |                          |
| 100                            | 0. | -4 × 10 <sup>-6</sup>   | 7.5 × 10 <sup>-5</sup>  | 3.2 × 10 <sup>-5</sup>   | -1.349 × 10 <sup>-4</sup> | 100                            | -4.677 × 10 <sup>-1</sup> | 4.008                    | 5.534                    | 7.753                    | 1.259 × 10 <sup>1</sup>  | 1.904 × 10 <sup>1</sup>  | 3.482 × 10 <sup>1</sup>  |
| 10                             | 0. | -5 × 10 <sup>-6</sup>   | 6.83 × 10 <sup>-5</sup> | 1.82 × 10 <sup>-4</sup>  | -1.181 × 10 <sup>-4</sup> | 10                             | -3.01 × 10 <sup>-2</sup>  | 2.264 × 10 <sup>-1</sup> | 1.869 × 10 <sup>-1</sup> | 2.874 × 10 <sup>-1</sup> | 4.997 × 10 <sup>-1</sup> | 7.032 × 10 <sup>-1</sup> | 1.259                    |
| 1                              | 0. | 1.41 × 10 <sup>-6</sup> | 7.89 × 10 <sup>-5</sup> | -1.95 × 10 <sup>-4</sup> | -4.93 × 10 <sup>-4</sup>  | 1                              | 0.                        | 2.3 × 10 <sup>-3</sup>   | 7.3 × 10 <sup>-3</sup>   | 9.1 × 10 <sup>-3</sup>   | 2.21 × 10 <sup>-2</sup>  | 3.55 × 10 <sup>-2</sup>  | 5.75 × 10 <sup>-2</sup>  |
| 0                              | 0. | -2 × 10 <sup>-6</sup>   | 3 × 10 <sup>-6</sup>    | 5.18 × 10 <sup>-6</sup>  | -1.93 × 10 <sup>-4</sup>  | 0                              | 0.                        | 0.                       | 0.                       | 0.                       | 0.                       | 0.                       | 1.1 × 10 <sup>-3</sup>   |
| $\rho/\psi$                    | 0  | 0.15                    | 0.3                     | 0.45                     | 0.6                       | 0.75                           | 0.9                       |                          |                          |                          |                          |                          |                          |
| Mean squared error $\psi$      |    |                         |                         |                          |                           | Mean squared error $\rho$      |                           |                          |                          |                          |                          |                          |                          |
| 100                            | 0. | -4 × 10 <sup>-6</sup>   | 9.36 × 10 <sup>-5</sup> | 3.84 × 10 <sup>-5</sup>  | -3.323 × 10 <sup>-4</sup> | 100                            | -7.165                    | 2.603 × 10 <sup>2</sup>  | 6.41 × 10 <sup>2</sup>   | 1.159 × 10 <sup>3</sup>  | 2.942 × 10 <sup>3</sup>  | 7.269 × 10 <sup>3</sup>  | 2.311 × 10 <sup>4</sup>  |
| 10                             | 0. | -5 × 10 <sup>-6</sup>   | 7.35 × 10 <sup>-5</sup> | 4.98 × 10 <sup>-5</sup>  | -2.335 × 10 <sup>-4</sup> | 10                             | -3.39 × 10 <sup>-2</sup>  | 7.926 × 10 <sup>-1</sup> | 9.461 × 10 <sup>-1</sup> | 1.597                    | 3.897                    | 7.94                     | 3.048 × 10 <sup>1</sup>  |
| 1                              | 0. | 1.69 × 10 <sup>-6</sup> | 1.89 × 10 <sup>-5</sup> | -4.25 × 10 <sup>-5</sup> | -6.65 × 10 <sup>-5</sup>  | 1                              | 0.                        | 2.3 × 10 <sup>-3</sup>   | 7.3 × 10 <sup>-3</sup>   | 9.1 × 10 <sup>-3</sup>   | 2.21 × 10 <sup>-2</sup>  | 3.69 × 10 <sup>-2</sup>  | 8.55 × 10 <sup>-2</sup>  |
| 0                              | 0. | -2 × 10 <sup>-6</sup>   | 3 × 10 <sup>-6</sup>    | 5.88 × 10 <sup>-6</sup>  | -2.35 × 10 <sup>-5</sup>  | 0                              | 0.                        | 0.                       | 0.                       | 0.                       | 0.                       | 0.                       | 1.1 × 10 <sup>-3</sup>   |
| $\rho/\psi$                    | 0  | 0.15                    | 0.3                     | 0.45                     | 0.6                       | 0.75                           | 0.9                       |                          |                          |                          |                          |                          |                          |

**Table S5** – Comparison of the (marginal) accuracy of  $\hat{\psi}$  (left column) and  $\hat{\rho}$  (right column) for  $\theta$  (eq. 45) with  $s = 10,000$  (i.e., the reference) and  $s = 1,000$  when assuming independent sites. Each cell shows the difference of the absolute mean difference ( $|MD_{s=10,000}| - |MD_{s=1,000}|$ ; first row), the difference of the mean absolute difference ( $MAD_{s=10,000} - MAD_{s=1,000}$ ; third row) and the difference of the mean squared error ( $MSE_{s=10,000} - MSE_{s=1,000}$ ; third row) each calculated over 10,000 data sets assuming independent sites and  $k = 100$ . Colors within each sub-table range from light yellow to dark red and scale between the minimal and the maximal absolute value to aid interpretation.

| Mean deviation $\psi$          |    |                          |                           |                           |                           | Mean deviation $\rho$          |                           |                           |                           |                           |                           |                           |                           |
|--------------------------------|----|--------------------------|---------------------------|---------------------------|---------------------------|--------------------------------|---------------------------|---------------------------|---------------------------|---------------------------|---------------------------|---------------------------|---------------------------|
| 100                            | 0. | -1.85 × 10 <sup>-4</sup> | -1.318 × 10 <sup>-3</sup> | -5.122 × 10 <sup>-3</sup> | 9.42 × 10 <sup>-4</sup>   | 100                            | -5.183 × 10 <sup>-1</sup> | -4.269 × 10 <sup>1</sup>  | -1.022 × 10 <sup>2</sup>  | -1.505 × 10 <sup>2</sup>  | -1.752 × 10 <sup>2</sup>  | -1.878 × 10 <sup>2</sup>  | -1.939 × 10 <sup>2</sup>  |
| 10                             | 0. | -1.8 × 10 <sup>-4</sup>  | -7.23 × 10 <sup>-4</sup>  | -1.2 × 10 <sup>-3</sup>   | 1.978 × 10 <sup>-3</sup>  | 10                             | -6.99 × 10 <sup>-2</sup>  | -1.214                    | -3.859                    | -1.013 × 10 <sup>1</sup>  | -1.734 × 10 <sup>1</sup>  | -2.804 × 10 <sup>1</sup>  | -7.122 × 10 <sup>1</sup>  |
| 1                              | 0. | -1.06 × 10 <sup>-4</sup> | 2.145 × 10 <sup>-3</sup>  | 3.872 × 10 <sup>-3</sup>  | 2.989 × 10 <sup>-3</sup>  | 1                              | -3.24 × 10 <sup>-2</sup>  | -1.903 × 10 <sup>-1</sup> | -2.88 × 10 <sup>-1</sup>  | -3.472 × 10 <sup>-1</sup> | -4.143 × 10 <sup>-1</sup> | -6.447 × 10 <sup>-1</sup> | -4.015                    |
| 0                              | 0. | -2.08 × 10 <sup>-4</sup> | -3.4 × 10 <sup>-4</sup>   | 1.084 × 10 <sup>-3</sup>  | 4.89 × 10 <sup>-4</sup>   | 0                              | 0.                        | -8.9 × 10 <sup>-3</sup>   | -2.63 × 10 <sup>-2</sup>  | -2.81 × 10 <sup>-2</sup>  | -4.07 × 10 <sup>-2</sup>  | -8.57 × 10 <sup>-2</sup>  | -2.359 × 10 <sup>-1</sup> |
| $\rho/\psi$                    | 0  | 0.15                     | 0.3                       | 0.45                      | 0.6                       | 0.75                           | 0.9                       |                           |                           |                           |                           |                           |                           |
| Mean absolute deviation $\psi$ |    |                          |                           |                           |                           | Mean absolute deviation $\rho$ |                           |                           |                           |                           |                           |                           |                           |
| 100                            | 0. | -1.85 × 10 <sup>-4</sup> | -1.148 × 10 <sup>-2</sup> | -2.683 × 10 <sup>-2</sup> | -2.55 × 10 <sup>-2</sup>  | 100                            | -1.025 × 10 <sup>1</sup>  | -6.374 × 10 <sup>1</sup>  | -1.282 × 10 <sup>2</sup>  | -1.744 × 10 <sup>2</sup>  | -2.004 × 10 <sup>2</sup>  | -2.152 × 10 <sup>2</sup>  | -2.228 × 10 <sup>2</sup>  |
| 10                             | 0. | -1.8 × 10 <sup>-4</sup>  | -9.249 × 10 <sup>-3</sup> | -1.973 × 10 <sup>-2</sup> | -1.877 × 10 <sup>-2</sup> | 10                             | -9.499 × 10 <sup>-1</sup> | -2.874                    | -6.814                    | -1.203 × 10 <sup>1</sup>  | -1.954 × 10 <sup>1</sup>  | -3.041 × 10 <sup>1</sup>  | -7.379 × 10 <sup>1</sup>  |
| 1                              | 0. | -1.06 × 10 <sup>-4</sup> | -8.285 × 10 <sup>-3</sup> | -1.638 × 10 <sup>-2</sup> | -1.488 × 10 <sup>-2</sup> | 1                              | -3.3 × 10 <sup>-2</sup>   | -2.177 × 10 <sup>-1</sup> | -3.472 × 10 <sup>-1</sup> | -3.95 × 10 <sup>-1</sup>  | -4.851 × 10 <sup>-1</sup> | -8.077 × 10 <sup>-1</sup> | -4.385                    |
| 0                              | 0. | -2.08 × 10 <sup>-4</sup> | -5.996 × 10 <sup>-3</sup> | -1.112 × 10 <sup>-2</sup> | -1.26 × 10 <sup>-2</sup>  | 0                              | 0.                        | -9.9 × 10 <sup>-3</sup>   | -2.63 × 10 <sup>-2</sup>  | -2.81 × 10 <sup>-2</sup>  | -4.07 × 10 <sup>-2</sup>  | -8.57 × 10 <sup>-2</sup>  | -2.359 × 10 <sup>-1</sup> |
| $\rho/\psi$                    | 0  | 0.15                     | 0.3                       | 0.45                      | 0.6                       | 0.75                           | 0.9                       |                           |                           |                           |                           |                           |                           |
| Mean squared error $\psi$      |    |                          |                           |                           |                           | Mean squared error $\rho$      |                           |                           |                           |                           |                           |                           |                           |
| 100                            | 0. | -1.85 × 10 <sup>-6</sup> | -4.095 × 10 <sup>-4</sup> | -2.648 × 10 <sup>-3</sup> | -2.541 × 10 <sup>-3</sup> | 100                            | -3.267 × 10 <sup>2</sup>  | -2.37 × 10 <sup>4</sup>   | -8.025 × 10 <sup>4</sup>  | -1.284 × 10 <sup>5</sup>  | -1.607 × 10 <sup>5</sup>  | -1.85 × 10 <sup>5</sup>   | -2.079 × 10 <sup>5</sup>  |
| 10                             | 0. | -1.8 × 10 <sup>-6</sup>  | -2.38 × 10 <sup>-4</sup>  | -1.343 × 10 <sup>-3</sup> | -1.396 × 10 <sup>-3</sup> | 10                             | -2.374                    | -3.349 × 10 <sup>1</sup>  | -3.964 × 10 <sup>1</sup>  | -4.08 × 10 <sup>1</sup>   | -9.157 × 10 <sup>1</sup>  | -1.562 × 10 <sup>2</sup>  | -5.389 × 10 <sup>2</sup>  |
| 1                              | 0. | -1.06 × 10 <sup>-6</sup> | -1.574 × 10 <sup>-4</sup> | -7.705 × 10 <sup>-4</sup> | -7.355 × 10 <sup>-4</sup> | 1                              | -3.3 × 10 <sup>-2</sup>   | -2.535 × 10 <sup>-1</sup> | -5.708 × 10 <sup>-1</sup> | -1.107                    | -3.145                    | -1.018 × 10 <sup>1</sup>  | -1.688 × 10 <sup>1</sup>  |
| 0                              | 0. | -2.08 × 10 <sup>-6</sup> | -8.522 × 10 <sup>-4</sup> | -3.748 × 10 <sup>-3</sup> | -4.979 × 10 <sup>-3</sup> | 0                              | 0.                        | -8.9 × 10 <sup>-3</sup>   | -2.65 × 10 <sup>-2</sup>  | -2.85 × 10 <sup>-2</sup>  | -4.37 × 10 <sup>-2</sup>  | -8.03 × 10 <sup>-2</sup>  | -4.651 × 10 <sup>-1</sup> |
| $\rho/\psi$                    | 0  | 0.15                     | 0.3                       | 0.45                      | 0.6                       | 0.75                           | 0.9                       |                           |                           |                           |                           |                           |                           |

**Table S6** – Overview of the (marginal) accuracy  $\hat{\psi}$  estimated from whole-genome simulations with  $l = 100$ . Each cell shows the mean difference (first row), the mean squared error (second row) and the median difference (third row) of  $\hat{\psi}$  calculated over 10,000 data sets assuming independent sites. Colors within each sub-table range from light yellow to dark red and scale between the minimal and the maximal absolute value to aid interpretation.

|                           | $s = 100$             |  |  |  |  |  | $s = 1,000$ |  |  |  |  |  | $s = 10,000$ |  |  |  |  |  |
|---------------------------|-----------------------|--|--|--|--|--|-------------|--|--|--|--|--|--------------|--|--|--|--|--|
| $k = 20$                  | Mean deviation $\psi$ |  |  |  |  |  |             |  |  |  |  |  |              |  |  |  |  |  |
|                           | 100                   |  |  |  |  |  | 10          |  |  |  |  |  | 100          |  |  |  |  |  |
|                           | 10                    |  |  |  |  |  | 1           |  |  |  |  |  | 10           |  |  |  |  |  |
| Mean squared error $\psi$ |                       |  |  |  |  |  |             |  |  |  |  |  |              |  |  |  |  |  |
| Median deviation $\psi$   |                       |  |  |  |  |  |             |  |  |  |  |  |              |  |  |  |  |  |
| $k = 50$                  | Mean deviation $\psi$ |  |  |  |  |  |             |  |  |  |  |  |              |  |  |  |  |  |
|                           | 100                   |  |  |  |  |  | 10          |  |  |  |  |  | 100          |  |  |  |  |  |
|                           | 10                    |  |  |  |  |  | 1           |  |  |  |  |  | 10           |  |  |  |  |  |
| Mean squared error $\psi$ |                       |  |  |  |  |  |             |  |  |  |  |  |              |  |  |  |  |  |
| Median deviation $\psi$   |                       |  |  |  |  |  |             |  |  |  |  |  |              |  |  |  |  |  |
| $k = 100$                 | Mean deviation $\psi$ |  |  |  |  |  |             |  |  |  |  |  |              |  |  |  |  |  |
|                           | 100                   |  |  |  |  |  | 10          |  |  |  |  |  | 100          |  |  |  |  |  |
|                           | 10                    |  |  |  |  |  | 1           |  |  |  |  |  | 10           |  |  |  |  |  |
| Mean squared error $\psi$ |                       |  |  |  |  |  |             |  |  |  |  |  |              |  |  |  |  |  |
| Median deviation $\psi$   |                       |  |  |  |  |  |             |  |  |  |  |  |              |  |  |  |  |  |
| $k = 200$                 | Mean deviation $\psi$ |  |  |  |  |  |             |  |  |  |  |  |              |  |  |  |  |  |
|                           | 100                   |  |  |  |  |  | 10          |  |  |  |  |  | 100          |  |  |  |  |  |
|                           | 10                    |  |  |  |  |  | 1           |  |  |  |  |  | 10           |  |  |  |  |  |
| Mean squared error $\psi$ |                       |  |  |  |  |  |             |  |  |  |  |  |              |  |  |  |  |  |
| Median deviation $\psi$   |                       |  |  |  |  |  |             |  |  |  |  |  |              |  |  |  |  |  |

Table S7 – Overview of the (marginal) accuracy  $\hat{\rho}$  estimated from whole-genome simulations with  $\ell = 100$ . Each cell shows the mean difference (first row), the mean squared error (second row) and the median difference (third row) of  $\hat{\rho}$  calculated over 10,000 data sets assuming independent sites. Colors within each sub-table range from light yellow to dark red and scale between the minimal and the maximal absolute value to aid interpretation.

|           |                           | $s = 100$ |                        |                        |                        |                        |                        | $s = 1,000$            |                        |     |                       |                        |                        | $s = 10,000$           |                        |                        |                     |                        |                        |                        |                        |                       |                        |                      |                     |
|-----------|---------------------------|-----------|------------------------|------------------------|------------------------|------------------------|------------------------|------------------------|------------------------|-----|-----------------------|------------------------|------------------------|------------------------|------------------------|------------------------|---------------------|------------------------|------------------------|------------------------|------------------------|-----------------------|------------------------|----------------------|---------------------|
| $k = 20$  | Mean deviation $\rho$     | 100       | -3.273                 | 3.394                  | 5.368                  | 7.794                  | $1.5 \times 10^1$      | $2.462 \times 10^1$    | $5.645 \times 10^1$    | 100 | -2.702                | 2.908                  | 5.409                  | 8.645                  | $1.562 \times 10^1$    | $3.974 \times 10^1$    | 100                 | -2.738                 | 1.914                  | 3.003                  | 5.216                  | 9.132                 | $1.475 \times 10^1$    | $3.655 \times 10^1$  |                     |
|           | Mean squared error $\rho$ | 10        | $2.824 \times 10^{-1}$ | $1.061 \times 10^{-1}$ | $3.021 \times 10^{-1}$ | $4.576 \times 10^{-1}$ | $6.911 \times 10^{-1}$ | $1.078 \times 10^0$    | $1.683 \times 10^0$    | 10  | $2.44 \times 10^{-1}$ | $1.469 \times 10^{-1}$ | $2.143 \times 10^{-1}$ | $3.071 \times 10^{-1}$ | $5.223 \times 10^{-1}$ | $9.704 \times 10^{-1}$ | 10                  | $2.288 \times 10^{-1}$ | $1.387 \times 10^{-1}$ | $2.065 \times 10^{-1}$ | $3.025 \times 10^{-1}$ | $4.94 \times 10^{-1}$ | $8.374 \times 10^{-1}$ | $1.756 \times 10^0$  |                     |
|           | Median deviation $\rho$   | 1         | $3.9 \times 10^{-1}$   | $4.45 \times 10^{-1}$  | $8.97 \times 10^{-2}$  | $1.488 \times 10^{-1}$ | $1.983 \times 10^{-1}$ | $2.483 \times 10^{-1}$ | $3.581 \times 10^{-1}$ | 1   | $1.8 \times 10^{-1}$  | $3.08 \times 10^{-1}$  | $6.98 \times 10^{-1}$  | $1.253 \times 10^0$    | $1.785 \times 10^0$    | $2.248 \times 10^0$    | 1                   | $1.1 \times 10^{-1}$   | $2.87 \times 10^{-1}$  | $6.68 \times 10^{-1}$  | $1.224 \times 10^0$    | $1.794 \times 10^0$   | $2.231 \times 10^0$    | $3.348 \times 10^0$  |                     |
|           | $\rho \neq \psi$          | 0         | 0                      | $5 \times 10^{-4}$     | $3.8 \times 10^{-2}$   | $2.83 \times 10^{-1}$  | $4.56 \times 10^{-1}$  | $1.157 \times 10^1$    | 0                      | 0   | $2 \times 10^{-4}$    | $2 \times 10^{-3}$     | $8.2 \times 10^{-1}$   | $2.08 \times 10^0$     | $3.99 \times 10^0$     | $1.063 \times 10^1$    | 0                   | 0                      | $2 \times 10^{-4}$     | $2.1 \times 10^{-3}$   | $8.5 \times 10^{-1}$   | $2.01 \times 10^0$    | $4.05 \times 10^0$     | $1.065 \times 10^1$  |                     |
| $k = 50$  | Mean deviation $\rho$     | 100       | 1.569 $\times 10^0$    | $6.065 \times 10^0$    | $1.142 \times 10^1$    | $2.21 \times 10^1$     | $3.965 \times 10^1$    | $8.787 \times 10^1$    | $1.194 \times 10^2$    | 100 | 9.752 $\times 10^0$   | $3.67 \times 10^1$     | $6.18 \times 10^1$     | $1.181 \times 10^2$    | $2.273 \times 10^2$    | $4.371 \times 10^2$    | 100                 | 9.165 $\times 10^0$    | $3.412 \times 10^1$    | $6.743 \times 10^1$    | $1.086 \times 10^2$    | $2.141 \times 10^2$   | $4.015 \times 10^2$    | $1.130 \times 10^3$  |                     |
|           | Mean squared error $\rho$ | 10        | 1.22                   | 3.307                  | 5.677                  | $1.099 \times 10^1$    | $1.899 \times 10^1$    | $3.279 \times 10^1$    | $5.194 \times 10^1$    | 10  | 9.166 $\times 10^0$   | $2.424 \times 10^1$    | 3.886                  | 7.101                  | $1.248 \times 10^1$    | $2.204 \times 10^1$    | 10                  | 8.778 $\times 10^0$    | 2.303                  | 3.733                  | 6.708                  | $1.214 \times 10^1$   | $2.184 \times 10^1$    | $5.741 \times 10^1$  |                     |
|           | Median deviation $\rho$   | 1         | $3.9 \times 10^{-1}$   | $4.49 \times 10^{-1}$  | $8.93 \times 10^{-2}$  | $1.852 \times 10^{-1}$ | $2.455 \times 10^{-1}$ | $3.983 \times 10^{-1}$ | $1.054 \times 10^0$    | 1   | $1.8 \times 10^{-1}$  | $3.08 \times 10^{-1}$  | $7.11 \times 10^{-1}$  | $1.393 \times 10^0$    | $2.187 \times 10^0$    | $3.348 \times 10^0$    | 1                   | $1.1 \times 10^{-1}$   | $2.87 \times 10^{-1}$  | $6.78 \times 10^{-1}$  | $1.333 \times 10^0$    | $2.002 \times 10^0$   | $3.249 \times 10^0$    | $8.52 \times 10^0$   |                     |
|           | $\rho \neq \psi$          | 0         | 0                      | $5 \times 10^{-4}$     | $3.8 \times 10^{-2}$   | $1.25 \times 10^{-1}$  | $2.83 \times 10^{-1}$  | $4.56 \times 10^{-1}$  | $1.155 \times 10^1$    | 0   | 0                     | $2 \times 10^{-4}$     | $2 \times 10^{-3}$     | $8.2 \times 10^{-1}$   | $2.08 \times 10^0$     | $3.99 \times 10^0$     | $1.063 \times 10^1$ | 0                      | 0                      | $2 \times 10^{-4}$     | $2.1 \times 10^{-3}$   | $8.5 \times 10^{-1}$  | $2.01 \times 10^0$     | $4.05 \times 10^0$   | $1.065 \times 10^1$ |
| $k = 100$ | Mean deviation $\rho$     | 100       | $-2.67 \times 10^{-1}$ | 3.602                  | 8.147                  | $1.584 \times 10^1$    | $3.835 \times 10^1$    | $3.085 \times 10^1$    | $5.675 \times 10^1$    | 100 | $1.017 \times 10^1$   | 1.884                  | 3.192                  | 6.391                  | 8.08                   | $1.582 \times 10^1$    | $2.394 \times 10^1$ | 100                    | $8.65 \times 10^0$     | 1.384                  | 2.523                  | 5.229                 | 7.122                  | $1.097 \times 10^1$  | $1.655 \times 10^1$ |
|           | Mean squared error $\rho$ | 10        | $6.3 \times 10^{-1}$   | $1.697 \times 10^1$    | $3.251 \times 10^1$    | $4.899 \times 10^1$    | $6.839 \times 10^1$    | $1.142 \times 10^2$    | $2.525 \times 10^2$    | 10  | $3 \times 10^0$       | $9 \times 10^0$        | $1.702 \times 10^1$    | $3.281 \times 10^1$    | $3.87 \times 10^1$     | $6.715 \times 10^1$    | 10                  | $2 \times 10^0$        | $8.2 \times 10^0$      | $1.606 \times 10^1$    | $2.927 \times 10^1$    | $3.649 \times 10^1$   | $6.374 \times 10^1$    | $1.229 \times 10^2$  |                     |
|           | Median deviation $\rho$   | 1         | $1.4 \times 10^{-1}$   | $3.12 \times 10^{-1}$  | $8.32 \times 10^{-2}$  | $1.153 \times 10^{-1}$ | $1.484 \times 10^{-1}$ | $2.059 \times 10^{-1}$ | $3.351 \times 10^{-1}$ | 1   | $4 \times 10^{-1}$    | $1.32 \times 10^{-1}$  | $5.22 \times 10^{-1}$  | $8.75 \times 10^{-1}$  | $1.182 \times 10^0$    | $1.872 \times 10^0$    | 1                   | $1 \times 10^{-1}$     | $1.18 \times 10^{-1}$  | $4.83 \times 10^{-1}$  | $8.28 \times 10^{-1}$  | $1.136 \times 10^0$   | $1.635 \times 10^0$    | $2.874 \times 10^0$  |                     |
|           | $\rho \neq \psi$          | 0         | 0                      | 0                      | $1.1 \times 10^{-2}$   | $3.9 \times 10^{-2}$   | $5.9 \times 10^{-2}$   | $1.8 \times 10^{-1}$   | $7.8 \times 10^{-2}$   | 0   | 0                     | 0                      | $2 \times 10^{-4}$     | $1.6 \times 10^{-3}$   | $3.4 \times 10^{-3}$   | $1.18 \times 10^{-2}$  | 0                   | 0                      | $1 \times 10^{-4}$     | $1.5 \times 10^{-3}$   | $3.8 \times 10^{-3}$   | $1.17 \times 10^{-2}$ | $5.68 \times 10^{-2}$  | $6.7 \times 10^{-2}$ |                     |
| $k = 200$ | Mean deviation $\rho$     | 100       | $6.629 \times 10^0$    | $6.862 \times 10^0$    | $1.555 \times 10^1$    | $2.853 \times 10^1$    | $5.222 \times 10^1$    | $1.196 \times 10^2$    | $3.547 \times 10^2$    | 100 | $2.659 \times 10^1$   | $3.064 \times 10^1$    | $5.896 \times 10^1$    | $1.013 \times 10^2$    | $1.698 \times 10^2$    | $2.891 \times 10^2$    | $7.69 \times 10^2$  | 100                    | $2.279 \times 10^1$    | $2.635 \times 10^1$    | $6.083 \times 10^1$    | $9.24 \times 10^1$    | $1.403 \times 10^2$    | $2.438 \times 10^2$  | $5.920 \times 10^2$ |
|           | Mean squared error $\rho$ | 10        | $6.686 \times 10^0$    | 3.182                  | 6.209                  | 9.239                  | $2.732 \times 10^1$    | $9.208 \times 10^1$    | $1.947 \times 10^2$    | 10  | $6.686 \times 10^0$   | 1.92                   | 3.224                  | 5.539                  | 8.14                   | $1.436 \times 10^1$    | $3.474 \times 10^1$ | 10                     | $5.268 \times 10^0$    | 1.792                  | 3.034                  | 5.215                 | 7.761                  | $1.319 \times 10^1$  | $3.178 \times 10^1$ |
|           | Median deviation $\rho$   | 1         | $1.4 \times 10^{-1}$   | $3.12 \times 10^{-1}$  | $8.44 \times 10^{-2}$  | $1.197 \times 10^{-1}$ | $1.55 \times 10^{-1}$  | $2.491 \times 10^{-1}$ | $6.301 \times 10^{-1}$ | 1   | $4 \times 10^{-1}$    | $1.32 \times 10^{-1}$  | $5.22 \times 10^{-1}$  | $8.75 \times 10^{-1}$  | $1.182 \times 10^0$    | $1.872 \times 10^0$    | 1                   | $1 \times 10^{-1}$     | $1.18 \times 10^{-1}$  | $4.83 \times 10^{-1}$  | $8.28 \times 10^{-1}$  | $1.136 \times 10^0$   | $1.635 \times 10^0$    | $2.874 \times 10^0$  |                     |
|           | $\rho \neq \psi$          | 0         | 0                      | 0                      | $1.1 \times 10^{-2}$   | $3.9 \times 10^{-2}$   | $5.9 \times 10^{-2}$   | $1.8 \times 10^{-1}$   | $7.8 \times 10^{-2}$   | 0   | 0                     | 0                      | $2 \times 10^{-4}$     | $1.6 \times 10^{-3}$   | $3.4 \times 10^{-3}$   | $1.18 \times 10^{-2}$  | 0                   | 0                      | $1 \times 10^{-4}$     | $1.5 \times 10^{-3}$   | $3.8 \times 10^{-3}$   | $1.17 \times 10^{-2}$ | $5.68 \times 10^{-2}$  | $6.7 \times 10^{-2}$ |                     |



**Table S9** – Overview of the (marginal) accuracy  $\hat{\rho}$  estimated from whole-genome simulations with  $\ell = 1,000$ . Each cell shows the mean difference (first row), the mean squared error (second row) and the median difference (third row) of  $\hat{\rho}$  calculated over 10,000 data sets assuming independent sites. Colors within each sub-table range from light yellow to dark red and scale between the minimal and the maximal absolute value to aid interpretation.

|           | $s = 100$                 |                        |                        |                       | $s = 1,000$               |                      |                       |                        | $s = 10,000$              |                       |                       |                       |                       |                       |                        |                        |             |                       |                       |                       |                       |                       |                        |                       |
|-----------|---------------------------|------------------------|------------------------|-----------------------|---------------------------|----------------------|-----------------------|------------------------|---------------------------|-----------------------|-----------------------|-----------------------|-----------------------|-----------------------|------------------------|------------------------|-------------|-----------------------|-----------------------|-----------------------|-----------------------|-----------------------|------------------------|-----------------------|
| $k = 20$  | Mean deviation $\rho$     |                        |                        |                       | Mean deviation $\rho$     |                      |                       |                        | Mean deviation $\rho$     |                       |                       |                       |                       |                       |                        |                        |             |                       |                       |                       |                       |                       |                        |                       |
|           | 100                       | $-1.66 \times 10^{-1}$ | $3.66 \times 10^{-1}$  | $5.64 \times 10^{-1}$ | 1.155                     | 1.316                | 2.187                 | 4.259                  | 100                       | $5.2 \times 10^{-2}$  | $1.69 \times 10^{-1}$ | $2.34 \times 10^{-1}$ | $6.46 \times 10^{-1}$ | $9.46 \times 10^{-1}$ | 1.437                  | 2.146                  | 100         | $-1.2 \times 10^{-3}$ | $1.80 \times 10^{-1}$ | $1.85 \times 10^{-1}$ | $5.28 \times 10^{-1}$ | $8.88 \times 10^{-1}$ | 1.346                  | 2.007                 |
|           | 10                        | $-2.2 \times 10^{-1}$  | $2.83 \times 10^{-1}$  | $6.99 \times 10^{-1}$ | $5.72 \times 10^{-2}$     | $5.5 \times 10^{-1}$ | $1.05 \times 10^{-1}$ | $2.426 \times 10^{-1}$ | 10                        | $2.5 \times 10^{-2}$  | $2.54 \times 10^{-1}$ | $4.03 \times 10^{-1}$ | $4.83 \times 10^{-1}$ | $8.7 \times 10^{-1}$  | $1.647 \times 10^{-1}$ | $1.976 \times 10^{-1}$ | 10          | $3.6 \times 10^{-3}$  | $2.28 \times 10^{-1}$ | $4.41 \times 10^{-1}$ | $4.2 \times 10^{-1}$  | $8.68 \times 10^{-1}$ | $1.045 \times 10^{-1}$ | $1.81 \times 10^{-1}$ |
|           | 1                         | 0                      | 0                      | 0                     | $6 \times 10^{-4}$        | $3.5 \times 10^{-3}$ | $1.2 \times 10^{-2}$  | $6.52 \times 10^{-2}$  | 1                         | 0                     | 0                     | 0                     | $1 \times 10^{-4}$    | $1.6 \times 10^{-3}$  | $9 \times 10^{-3}$     | $5.17 \times 10^{-2}$  | 1           | 0                     | 0                     | 0                     | $1 \times 10^{-4}$    | $1.3 \times 10^{-3}$  | $7.8 \times 10^{-3}$   | $4.96 \times 10^{-2}$ |
| 0         | 0                         | 0                      | 0                      | 0                     | 0                         | 0                    | 0                     | 0                      | 0                         | 0                     | 0                     | 0                     | 0                     | 0                     | 0                      | 0                      | 0           | 0                     | 0                     | 0                     | 0                     | 0                     | 0                      |                       |
|           | $\rho/\psi$               | 0                      | 0.15                   | 0.3                   | 0.45                      | 0.6                  | 0.75                  | 0.9                    | $\rho/\psi$               | 0                     | 0.15                  | 0.3                   | 0.45                  | 0.6                   | 0.75                   | 0.9                    | $\rho/\psi$ | 0                     | 0.15                  | 0.3                   | 0.45                  | 0.6                   | 0.75                   | 0.9                   |
| $k = 50$  | Mean squared error $\rho$ |                        |                        |                       | Mean squared error $\rho$ |                      |                       |                        | Mean squared error $\rho$ |                       |                       |                       |                       |                       |                        |                        |             |                       |                       |                       |                       |                       |                        |                       |
|           | 100                       | $1.62 \times 10^{-1}$  | $6.11 \times 10^{-1}$  | $1.00 \times 10^0$    | $1.705 \times 10^0$       | $2.44 \times 10^0$   | $3.788 \times 10^0$   | $8.60 \times 10^0$     | 100                       | 7.971                 | $3.449 \times 10^1$   | $6.879 \times 10^1$   | $1.112 \times 10^2$   | $1.704 \times 10^2$   | $2.807 \times 10^2$    | $5.51 \times 10^2$     | 100         | 7.609                 | $3.194 \times 10^1$   | $6.124 \times 10^1$   | $1.052 \times 10^2$   | $1.61 \times 10^2$    | $2.427 \times 10^2$    | $5.18 \times 10^2$    |
|           | 10                        | $1.25 \times 10^{-1}$  | $3.647 \times 10^{-1}$ | $6.82 \times 10^{-1}$ | 1.007                     | 1.485                | 2.138                 | 4.532                  | 10                        | $5.91 \times 10^{-1}$ | $2.416 \times 10^1$   | $5.013 \times 10^1$   | $8.083 \times 10^1$   | 1.214                 | 1.711                  | 3.463                  | 10          | $5.2 \times 10^{-1}$  | $2.226 \times 10^1$   | $4.883 \times 10^1$   | $7.7 \times 10^1$     | 1.186                 | 1.68                   | 3.341                 |
|           | 1                         | 0                      | 0                      | 0                     | $6 \times 10^{-4}$        | $3.5 \times 10^{-3}$ | $1.2 \times 10^{-2}$  | $6.52 \times 10^{-2}$  | 1                         | 0                     | 0                     | 0                     | $1 \times 10^{-4}$    | $1.6 \times 10^{-3}$  | $9 \times 10^{-3}$     | $5.17 \times 10^{-2}$  | 1           | 0                     | 0                     | 0                     | $1 \times 10^{-4}$    | $1.3 \times 10^{-3}$  | $7.8 \times 10^{-3}$   | $4.96 \times 10^{-2}$ |
| 0         | 0                         | 0                      | 0                      | 0                     | 0                         | 0                    | 0                     | 0                      | 0                         | 0                     | 0                     | 0                     | 0                     | 0                     | 0                      | 0                      | 0           | 0                     | 0                     | 0                     | 0                     | 0                     | 0                      |                       |
|           | $\rho/\psi$               | 0                      | 0.15                   | 0.3                   | 0.45                      | 0.6                  | 0.75                  | 0.9                    | $\rho/\psi$               | 0                     | 0.15                  | 0.3                   | 0.45                  | 0.6                   | 0.75                   | 0.9                    | $\rho/\psi$ | 0                     | 0.15                  | 0.3                   | 0.45                  | 0.6                   | 0.75                   | 0.9                   |
| $k = 100$ | Median deviation $\rho$   |                        |                        |                       | Median deviation $\rho$   |                      |                       |                        | Median deviation $\rho$   |                       |                       |                       |                       |                       |                        |                        |             |                       |                       |                       |                       |                       |                        |                       |
|           | 100                       | 0                      | 0                      | 0                     | 0                         | 0                    | 0                     | 0                      | 100                       | 0                     | 0                     | 0                     | 0                     | 0                     | 0                      | 0                      | 100         | 0                     | 0                     | 0                     | 0                     | 0                     | 0                      | 0                     |
|           | 10                        | 0                      | 0                      | 0                     | 0                         | 0                    | 0                     | 0                      | 10                        | 0                     | 0                     | 0                     | 0                     | 0                     | 0                      | 0                      | 10          | 0                     | 0                     | 0                     | 0                     | 0                     | 0                      | 0                     |
|           | 1                         | 0                      | 0                      | 0                     | 0                         | 0                    | 0                     | 0                      | 1                         | 0                     | 0                     | 0                     | 0                     | 0                     | 0                      | 0                      | 1           | 0                     | 0                     | 0                     | 0                     | 0                     | 0                      | 0                     |
| 0         | 0                         | 0                      | 0                      | 0                     | 0                         | 0                    | 0                     | 0                      | 0                         | 0                     | 0                     | 0                     | 0                     | 0                     | 0                      | 0                      | 0           | 0                     | 0                     | 0                     | 0                     | 0                     | 0                      |                       |
|           | $\rho/\psi$               | 0                      | 0.15                   | 0.3                   | 0.45                      | 0.6                  | 0.75                  | 0.9                    | $\rho/\psi$               | 0                     | 0.15                  | 0.3                   | 0.45                  | 0.6                   | 0.75                   | 0.9                    | $\rho/\psi$ | 0                     | 0.15                  | 0.3                   | 0.45                  | 0.6                   | 0.75                   | 0.9                   |





| Mean deviation $\psi$ |    |                         |                         |                         |                         | Mean deviation $\rho$  |                         |             |                       |                         |                         |                        |                      |                      |                         |
|-----------------------|----|-------------------------|-------------------------|-------------------------|-------------------------|------------------------|-------------------------|-------------|-----------------------|-------------------------|-------------------------|------------------------|----------------------|----------------------|-------------------------|
| 100                   | 0. | $-7.104 \times 10^{-3}$ | $-4.435 \times 10^{-2}$ | $-5.599 \times 10^{-2}$ | $-5.365 \times 10^{-2}$ | $-4.04 \times 10^{-2}$ | $-5.625 \times 10^{-2}$ | 100         | $2 \times 10^{-4}$    | $-1.455 \times 10^1$    | $-1.532 \times 10^2$    | $-2.159 \times 10^2$   | $-2.167 \times 10^2$ | $-1.719 \times 10^2$ | $6.548 \times 10^1$     |
| 10                    | 0. | $-4.676 \times 10^{-3}$ | $-4.175 \times 10^{-2}$ | $-3.283 \times 10^{-2}$ | $-1.369 \times 10^{-2}$ | $3.921 \times 10^{-3}$ | $-2.135 \times 10^{-2}$ | 10          | $-3.2 \times 10^{-3}$ | $-6.417 \times 10^{-1}$ | $-1.25 \times 10^1$     | $-4.546 \times 10^1$   | $-7.281 \times 10^1$ | $-8.314 \times 10^1$ | $-1.309 \times 10^2$    |
| 1                     | 0. | $-1.734 \times 10^{-3}$ | $-1.64 \times 10^{-2}$  | $2.939 \times 10^{-3}$  | $1.397 \times 10^{-2}$  | $5.69 \times 10^{-2}$  | $2.731 \times 10^{-3}$  | 1           | 0.                    | $-1.175 \times 10^{-1}$ | $-1.136$                | $-4.147$               | $-6.834$             | $-9.952$             | $-7.571 \times 10^{-1}$ |
| 0                     | 0. | $1.14 \times 10^{-4}$   | $2.138 \times 10^{-2}$  | $5.896 \times 10^{-2}$  | $8.471 \times 10^{-2}$  | $8.712 \times 10^{-2}$ | $1.423 \times 10^{-2}$  | 0           | 0.                    | $-3.2 \times 10^{-3}$   | $-2.988 \times 10^{-1}$ | $-9.28 \times 10^{-1}$ | $-1.8$               | $-2.185$             | $-1.789 \times 10^{-1}$ |
| $\rho/\psi$           | 0  | 0.15                    | 0.3                     | 0.45                    | 0.6                     | 0.75                   | 0.9                     | $\rho/\psi$ | 0                     | 0.15                    | 0.3                     | 0.45                   | 0.6                  | 0.75                 | 0.9                     |

  

| Mean absolute deviation $\psi$ |    |                         |                         |                         |                         | Mean absolute deviation $\rho$ |                         |             |                        |                         |                         |                        |                         |                         |                         |
|--------------------------------|----|-------------------------|-------------------------|-------------------------|-------------------------|--------------------------------|-------------------------|-------------|------------------------|-------------------------|-------------------------|------------------------|-------------------------|-------------------------|-------------------------|
| 100                            | 0. | $-1.804 \times 10^{-3}$ | $-9.674 \times 10^{-2}$ | $-1.424 \times 10^{-1}$ | $-1.575 \times 10^{-1}$ | $-1.336 \times 10^{-1}$        | $-7.916 \times 10^{-2}$ | 100         | $3 \times 10^{-3}$     | $-2.104 \times 10^{-1}$ | $-4.002 \times 10^1$    | $-1.224 \times 10^2$   | $-1.418 \times 10^2$    | $-6.335 \times 10^1$    | $-7.009 \times 10^1$    |
| 10                             | 0. | $-1.507 \times 10^{-2}$ | $-1.01 \times 10^{-1}$  | $-1.434 \times 10^{-1}$ | $-1.539 \times 10^{-1}$ | $-1.371 \times 10^{-1}$        | $-5.207 \times 10^{-2}$ | 10          | $-1.12 \times 10^{-2}$ | $-8.42 \times 10^{-2}$  | $-2.421$                | $-7.039$               | $-9.535$                | $-6.267$                | $-3.542 \times 10^1$    |
| 1                              | 0. | $-9.932 \times 10^{-3}$ | $-7.733 \times 10^{-2}$ | $-1.244 \times 10^{-1}$ | $-1.382 \times 10^{-1}$ | $-1.047 \times 10^{-1}$        | $-2.857 \times 10^{-2}$ | 1           | 0.                     | $-5.1 \times 10^{-3}$   | $-1.858 \times 10^{-1}$ | $-5.43 \times 10^{-1}$ | $-5.8 \times 10^{-1}$   | $-2.645 \times 10^{-1}$ | $-2.322$                |
| 0                              | 0. | $-3.18 \times 10^{-4}$  | $-2.144 \times 10^{-2}$ | $-5.987 \times 10^{-2}$ | $-8.863 \times 10^{-2}$ | $-9.293 \times 10^{-2}$        | $-2.057 \times 10^{-2}$ | 0           | 0.                     | 0.                      | $-1 \times 10^{-3}$     | $-4.46 \times 10^{-2}$ | $-1.006 \times 10^{-1}$ | $-1.91 \times 10^{-1}$  | $-3.919 \times 10^{-1}$ |
| $\rho/\psi$                    | 0  | 0.15                    | 0.3                     | 0.45                    | 0.6                     | 0.75                           | 0.9                     | $\rho/\psi$ | 0                      | 0.15                    | 0.3                     | 0.45                   | 0.6                     | 0.75                    | 0.9                     |

  

| Mean squared error $\psi$ |    |                         |                         |                         |                         | Mean squared error $\rho$ |                         |             |                         |                         |                         |                      |                      |                      |                      |
|---------------------------|----|-------------------------|-------------------------|-------------------------|-------------------------|---------------------------|-------------------------|-------------|-------------------------|-------------------------|-------------------------|----------------------|----------------------|----------------------|----------------------|
| 100                       | 0. | $-1.144 \times 10^{-3}$ | $-2.133 \times 10^{-2}$ | $-3.625 \times 10^{-2}$ | $-3.627 \times 10^{-2}$ | $-2.398 \times 10^{-2}$   | $-7.472 \times 10^{-3}$ | 100         | $-4.058 \times 10^{-1}$ | $-7.101 \times 10^1$    | $-1.355 \times 10^2$    | $-2.096 \times 10^2$ | $-2.266 \times 10^2$ | $-2.056 \times 10^2$ | $-2.273 \times 10^2$ |
| 10                        | 0. | $-7.316 \times 10^{-2}$ | $-2.092 \times 10^{-2}$ | $-3.297 \times 10^{-2}$ | $-3.295 \times 10^{-2}$ | $-2.933 \times 10^{-2}$   | $-5.476 \times 10^{-3}$ | 10          | $-4.86 \times 10^{-2}$  | $-2.757 \times 10^1$    | $-1.428 \times 10^1$    | $-2.029 \times 10^1$ | $-4.815 \times 10^1$ | $-6.248 \times 10^1$ | $-1.16 \times 10^2$  |
| 1                         | 0. | $-4.698 \times 10^{-4}$ | $-8.935 \times 10^{-3}$ | $-2.134 \times 10^{-2}$ | $-2.785 \times 10^{-2}$ | $-2.333 \times 10^{-2}$   | $-2.421 \times 10^{-3}$ | 1           | 0.                      | $-3.277 \times 10^{-1}$ | $-1.014 \times 10^1$    | $-1.292 \times 10^1$ | $-7.836 \times 10^1$ | $-2.839 \times 10^1$ | $-2.058 \times 10^2$ |
| 0                         | 0. | $-7.58 \times 10^{-4}$  | $-2.1 \times 10^{-3}$   | $-1.094 \times 10^{-2}$ | $-2.187 \times 10^{-2}$ | $-2.459 \times 10^{-2}$   | $-2.193 \times 10^{-3}$ | 0           | 0.                      | $-3.2 \times 10^{-3}$   | $-3.892 \times 10^{-1}$ | $-4.678$             | $-3.102 \times 10^1$ | $-1.047 \times 10^2$ | $-4.275 \times 10^2$ |
| $\rho/\psi$               | 0  | 0.15                    | 0.3                     | 0.45                    | 0.6                     | 0.75                      | 0.9                     | $\rho/\psi$ | 0                       | 0.15                    | 0.3                     | 0.45                 | 0.6                  | 0.75                 | 0.9                  |

**Table S14** – Comparison of the (marginal) accuracy of  $\hat{\psi}$  (left column) and  $\hat{\rho}$  (right column) for the maximum likelihood estimate based on the full SFS (i.e., the reference) and the lumped SFS where the  $i = 15$  entry in the SFS contains the aggregate of the higher frequency classes when assuming independent sites.. Each cell shows the difference of the absolute mean difference ( $|MD_{i=0}| - |MD_{i=15}|$ ; first row), the difference of the mean absolute difference ( $MAD_{i=0} - MAD_{i=15}$ ; third row) and the difference of the mean squared error ( $MSE_{i=0} - MSE_{i=15}$ ; third row) each calculated over 10,000 data sets assuming independent sites,  $k = 100$ , and  $\theta$  (eq. 45) with  $s = 10,000$ . Colors within each sub-table range from light yellow to dark red and scale between the minimal and the maximal absolute value to aid interpretation.

| Mean deviation $\psi$ |    |                        |                         |                         |                         | Mean deviation $\rho$   |                         |             |                    |                       |                         |                         |                         |                         |                         |
|-----------------------|----|------------------------|-------------------------|-------------------------|-------------------------|-------------------------|-------------------------|-------------|--------------------|-----------------------|-------------------------|-------------------------|-------------------------|-------------------------|-------------------------|
| 100                   | 0. | $-8.9 \times 10^{-5}$  | $-7.793 \times 10^{-3}$ | $-1.807 \times 10^{-2}$ | $-4.014 \times 10^{-2}$ | $-8.249 \times 10^{-2}$ | $-7.883 \times 10^{-3}$ | 100         | $8 \times 10^{-4}$ | $1.96 \times 10^{-1}$ | $-1.899 \times 10^1$    | $-8.785 \times 10^1$    | $-9.507 \times 10^1$    | $-2.532$                | $-3.133 \times 10^1$    |
| 10                    | 0. | $-1.02 \times 10^{-4}$ | $-4.438 \times 10^{-3}$ | $-7.786 \times 10^{-3}$ | $-8.974 \times 10^{-3}$ | $-3.399 \times 10^{-2}$ | $1.876 \times 10^{-2}$  | 10          | $2 \times 10^{-4}$ | $7 \times 10^{-3}$    | $-5.581 \times 10^{-1}$ | $-3.813$                | $-6.43$                 | $-1.991$                | $-3.359 \times 10^1$    |
| 1                     | 0. | $1.01 \times 10^{-4}$  | $1.903 \times 10^{-3}$  | $3.985 \times 10^{-3}$  | $2.064 \times 10^{-2}$  | $7.852 \times 10^{-2}$  | $2.682 \times 10^{-2}$  | 1           | 0.                 | $-5.1 \times 10^{-3}$ | $-1.208 \times 10^{-1}$ | $-3.394 \times 10^{-1}$ | $-5.264 \times 10^{-1}$ | $-2.145 \times 10^{-1}$ | $-2.223$                |
| 0                     | 0. | $-2.1 \times 10^{-5}$  | $5.1 \times 10^{-5}$    | $5.61 \times 10^{-5}$   | $1.49 \times 10^{-2}$   | $2.39 \times 10^{-3}$   | $2.098 \times 10^{-2}$  | 0           | 0.                 | 0.                    | $-1 \times 10^{-3}$     | $-4.46 \times 10^{-2}$  | $-1.006 \times 10^{-1}$ | $-1.91 \times 10^{-1}$  | $-3.919 \times 10^{-1}$ |
| $\rho/\psi$           | 0  | 0.15                   | 0.3                     | 0.45                    | 0.6                     | 0.75                    | 0.9                     | $\rho/\psi$ | 0                  | 0.15                  | 0.3                     | 0.45                    | 0.6                     | 0.75                    | 0.9                     |

  

| Mean absolute deviation $\psi$ |    |                        |                         |                         |                         | Mean absolute deviation $\rho$ |                         |             |                        |                         |                         |                        |                         |                         |                         |
|--------------------------------|----|------------------------|-------------------------|-------------------------|-------------------------|--------------------------------|-------------------------|-------------|------------------------|-------------------------|-------------------------|------------------------|-------------------------|-------------------------|-------------------------|
| 100                            | 0. | $-1.27 \times 10^{-4}$ | $-2.519 \times 10^{-3}$ | $-7.137 \times 10^{-3}$ | $-1.014 \times 10^{-1}$ | $-9.353 \times 10^{-2}$        | $-4.608 \times 10^{-2}$ | 100         | $3 \times 10^{-3}$     | $-2.104 \times 10^{-1}$ | $-4.002 \times 10^1$    | $-1.224 \times 10^2$   | $-1.418 \times 10^2$    | $-6.335 \times 10^1$    | $-7.009 \times 10^1$    |
| 10                             | 0. | $-3.18 \times 10^{-4}$ | $-1.939 \times 10^{-2}$ | $-5.674 \times 10^{-2}$ | $-6.939 \times 10^{-2}$ | $-6.557 \times 10^{-2}$        | $-4.57 \times 10^{-2}$  | 10          | $-1.12 \times 10^{-2}$ | $-8.42 \times 10^{-2}$  | $-2.421$                | $-7.039$               | $-9.535$                | $-6.267$                | $-3.542 \times 10^1$    |
| 1                              | 0. | $-1.25 \times 10^{-4}$ | $-9.675 \times 10^{-3}$ | $-3.673 \times 10^{-2}$ | $-3.444 \times 10^{-2}$ | $-2.095 \times 10^{-2}$        | $-3.629 \times 10^{-2}$ | 1           | 0.                     | $-5.1 \times 10^{-3}$   | $-1.858 \times 10^{-1}$ | $-5.43 \times 10^{-1}$ | $-5.8 \times 10^{-1}$   | $-2.645 \times 10^{-1}$ | $-2.322$                |
| 0                              | 0. | $-5.5 \times 10^{-5}$  | $-8.63 \times 10^{-4}$  | $-8.544 \times 10^{-3}$ | $-2.117 \times 10^{-2}$ | $-9.636 \times 10^{-3}$        | $-2.6 \times 10^{-2}$   | 0           | 0.                     | 0.                      | $-1 \times 10^{-3}$     | $-4.46 \times 10^{-2}$ | $-1.006 \times 10^{-1}$ | $-1.91 \times 10^{-1}$  | $-3.919 \times 10^{-1}$ |
| $\rho/\psi$                    | 0  | 0.15                   | 0.3                     | 0.45                    | 0.6                     | 0.75                           | 0.9                     | $\rho/\psi$ | 0                      | 0.15                    | 0.3                     | 0.45                   | 0.6                     | 0.75                    | 0.9                     |

  

| Mean squared error $\psi$ |    |                        |                         |                         |                         | Mean squared error $\rho$ |                         |             |                       |                       |                         |                         |                         |                         |                      |
|---------------------------|----|------------------------|-------------------------|-------------------------|-------------------------|---------------------------|-------------------------|-------------|-----------------------|-----------------------|-------------------------|-------------------------|-------------------------|-------------------------|----------------------|
| 100                       | 0. | $-1.81 \times 10^{-4}$ | $-1.845 \times 10^{-3}$ | $-1.068 \times 10^{-2}$ | $-1.907 \times 10^{-2}$ | $-1.607 \times 10^{-2}$   | $-4.656 \times 10^{-3}$ | 100         | $8 \times 10^{-4}$    | $-1.3 \times 10^1$    | $-9.289 \times 10^1$    | $-7.059 \times 10^1$    | $-1.926 \times 10^2$    | $-4.002 \times 10^2$    | $-5.47 \times 10^2$  |
| 10                        | 0. | $-3.74 \times 10^{-4}$ | $-1.079 \times 10^{-3}$ | $-5.946 \times 10^{-3}$ | $-1.02 \times 10^{-2}$  | $-1.01 \times 10^{-2}$    | $-6.738 \times 10^{-3}$ | 10          | $-1.1 \times 10^{-2}$ | $-3.286 \times 10^1$  | $-2.313 \times 10^1$    | $-2.029 \times 10^1$    | $-7.475 \times 10^1$    | $-8.405 \times 10^1$    | $-2.005 \times 10^2$ |
| 1                         | 0. | $-2.13 \times 10^{-4}$ | $-6.9 \times 10^{-4}$   | $-3.929 \times 10^{-3}$ | $-3.339 \times 10^{-3}$ | $-1.511 \times 10^{-2}$   | $-5.75 \times 10^{-3}$  | 1           | 0.                    | $-5.1 \times 10^{-3}$ | $-1.952 \times 10^{-1}$ | $-9.908 \times 10^{-1}$ | $-1.99$                 | $-9.893 \times 10^{-1}$ | $-1.277 \times 10^2$ |
| 0                         | 0. | $-5.5 \times 10^{-5}$  | $-1.569 \times 10^{-4}$ | $-7.567 \times 10^{-4}$ | $-2.463 \times 10^{-3}$ | $-5.216 \times 10^{-3}$   | $-4.653 \times 10^{-3}$ | 0           | 0.                    | 0.                    | $-1 \times 10^{-3}$     | $-4.46 \times 10^{-2}$  | $-1.038 \times 10^{-1}$ | $-2.15 \times 10^{-1}$  | $-2.175$             |
| $\rho/\psi$               | 0  | 0.15                   | 0.3                     | 0.45                    | 0.6                     | 0.75                      | 0.9                     | $\rho/\psi$ | 0                     | 0.15                  | 0.3                     | 0.45                    | 0.6                     | 0.75                    | 0.9                  |
